# Supplementary material
Source: PubMed Central journal article supplement (PMC2865268)
Supplement: supp_M109.094698_jbc.M109.094698-1.pdf [file supp_M109.094698_jbc.M109.094698-1.pdf]

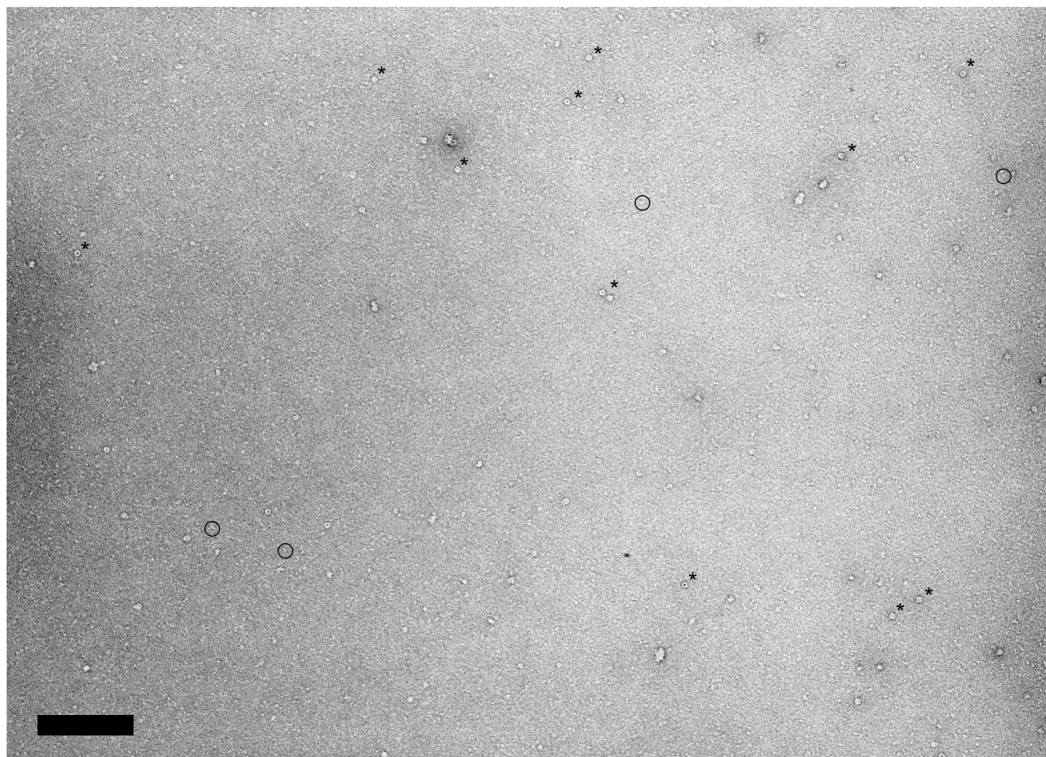

**Supplementary FIGURE 1.** Electron micrograph used for the elaboration of the Type II oligomer gallery. Some Type II oligomers are indicated by \*. Other less numerous particles corresponding to dimeric extended shape i.e. 'flying seagull' or tightly packed shape are indicated by circles. Scale bar: 2000 Å.
